# Supplementary material
Source: publisher site journal article supplement (https://www.dovepress.com/article/400834)
Supplement: Supplementary file 1 [file get_supplementary_file.php]

### Positive predictive value of non-traumatic bleeding diagnoses in the Danish National Patient Register

### *Supporting information*

**Table S1** Overview of the included ICD-codes for non-traumatic bleeding in the study

| **ICD-10 code** | **Description** |
| --- | --- |
| **Central Nervous System** | |
| I60 | Subarachnoid hemorrhage |
| I61 | Intracerebral hemorrhage |
| I62 | Other nontraumatic intracranial hemorrhage |
| **Thorax and respiratory passages** | |
| I312 | Hemopericardium, not elsewhere classified |
| J942 | Hemothorax |
| R04 | Hemorrhage from respiratory passages |
| **Gastrointestinal and intraabdominal** | |
| K228(F)** | Esophageal bleeding not elsewhere classified (DK only) |
| K250 | Gastric ulcer, acute with hemorrhage |
| K252** | Gastric ulcer, acute with both hemorrhage and perforation |
| K254 | Gastric ulcer, Chronic or unspecified with hemorrhage |
| K256** | Gastric ulcer, Chronic or unspecified with both hemorrhage and perforation |
| K260 | Duodenal ulcer, acute with hemorrhage |
| K262** | Duodenal ulcer, acute with both hemorrhage and perforation |
| K264 | Duodenal ulcer, chronic or unspecified with hemorrhage |
| K266** | Duodenal ulcer, chronic or unspecified with both hemorrhage and perforation |
| K270 | Peptic ulcer, site unspecified, acute with hemorrhage |
| K272 | Peptic ulcer, site unspecified, acute with both hemorrhage and perforation |
| K274 | Peptic ulcer, site unspecified, chronic, or unspecified with hemorrhage |
| K276** | Peptic ulcer, site unspecified, chronic, or unspecified with both hemorrhage and perforation |
| K280 | Gastrojejunal ulcer, acute with hemorrhage |
| K282** | Gastrojejunal ulcer, acute with both hemorrhage and perforation |
| K284** | Gastrojejunal ulcer, chronic or unspecified with hemorrhage |
| K286** | Gastrojejunal ulcer, chronic or unspecified with both hemorrhage and perforation |
| K290** | Acute hemorrhagic gastritis |
| K298(A)** | Duodenitis, acute with bleeding |
| K625 | Hemorrhage of anus and rectum |
| K638B** | Gastrointestinal bleeding, not elsewhere classified (DK only) |
| K638C | Hemorrhage from the gastrointestinal tract, not elsewhere classified (DK only) |
| K661 | Hemoperitoneum |
| K838(F)** | Biliary tract hemorrhage |
| K868(G)** | Pancreatic hemorrhage, not elsewhere classified |
| K920 | Hematemesis |
| K921 | Melena |
| K922 | Gastrointestinal hemorrhage, unspecified |
| **Reproductive tract** | |
| N938 | Other specified abnormal uterine and vaginal bleeding |
| N939 | Abnormal uterine and vaginal bleeding, unspecified |
| N95 | Postmenopausal bleeding |
| **Urinary tract** | |
| R31 | Unspecified hematuria |
| **Other bleeding location*** | |
| M250 | Hemarthrosis |
| R58 | Hemorrhage, not elsewhere classified |
|  | |

**Notes:**

*The category “Other bleeding location” included bleedings not specified to major anatomical regions such as bleeding from a leg wound.

**The following ICD-10 codes were not used in any admissions of the study population in the study period in the Danish National Patient Registry: K228(F), K252, K256, K262, K266, K276, K282, K284, K286, K290, K298(A), K638B, K838(F), K868 (G).

**Abbreviations:** ICD-10, International Classification of Diseases, Tenth Revision; DK, Denmark.

**Table S2** Overview of symptoms and objective findings of bleeding according to ICD-10 code, where at least one of the listed symptoms or objective findings needed to be present to validate the bleeding code in the study.

| **ICD-10 code** | **Relevant symptoms of bleeding** | **Objective findings of bleeding** |
| --- | --- | --- |
| **Central Nervous System** | | |
| I60 Subarachnoid hemorrhage |  | CT description  MRI description |
| I61 Intracerebral hemorrhage |
| I62 Other nontraumatic intracranial hemorrhage |
| **Thorax and respiratory passages** | | |
| I312 Hemopericardium, not elsewhere classified |  | Echocardiography  Radiographic description |
| J942 Hemothorax |  | Radiographic description  CT description |
| R04 Hemorrhage from respiratory passages | Epistaxis  Hemoptysis | Epistaxis  Hemoptysis |
| **Gastrointestinal and intraabdominal** | | |
| K250 Gastric ulcer, acute with hemorrhage |  | Endoscopic description |
| K254 Gastric ulcer, Chronic or unspecified with hemorrhage |
| K260 Duodenal ulcer, acute with hemorrhage |
| K264 Duodenal ulcer, chronic or unspecified with hemorrhage |
| K270 Peptic ulcer, site unspecified, acute with hemorrhage | Bright red blood in vomit  Hematemesis  Melena | Endoscopic description |
| K272 Peptic ulcer, site unspecified, acute with both hemorrhage and perforation |  | Endoscopic description  CT description |
| K274 Peptic ulcer, site unspecified, chronic, or unspecified with hemorrhage | Bright red blood in vomit  Hematemesis  Melena | Endoscopic description |
| K280 Gastrojejunal ulcer, acute with hemorrhage |  | Endoscopic description |
| K625 Hemorrhage of anus and rectum | Hematochezia | Hematochezia |
| K638C Hemorrhage from the gastrointestinal tract, not elsewhere classified (DK only) | Hematemesis  Melena  Hematochezia | Hematemesis  Melena  Hematochezia |
| K661 Hemoperitoneum |  | CT description |
| K920 Hematemesis | Hematemesis | Hematemesis |
| K921 Melena | Melena | Melena |
| K922 Gastrointestinal hemorrhage, unspecified | Hematemesis  Melena  Hematochezia | Hematemesis  Melena  Hematochezia |
| **Reproductive tract** | | |
| N938 Other specified abnormal uterine and vaginal bleeding | Vaginal bleeding | Vaginal bleeding  Hysteroscopic description |
| N939 Abnormal uterine and vaginal bleeding, unspecified |
| N95 Postmenopausal bleeding |
| **Urinary tract** | | |
| R31 Unspecified hematuria | Macroscopic hematuria | Hematuria  Cystoscopic description  Positive dipstick test for microscopic hematuria |
| **Other bleeding location*** | | |
| M250 Hemarthrosis |  | MRI description  CT description  Synovial fluid analysis |
| R58 Hemorrhage, not elsewhere classified | Bleeding from wound | Bleeding from wound |
|  | | |

**Notes:**

*The category “Other bleeding location” included bleedings not specified to major anatomical regions such as bleeding from a leg wound.

**Abbreviations:** CT, computed tomography; DK, Denmark; ICD-10, International Classification of Diseases, Tenth Revision; MRI, magnetic resonance imaging.
